# Supplementary material for: Effect of Anti-Inflammatory Diets on Pain in Rheumatoid Arthritis: A Systematic Review and Meta-Analysis
Source: MDPI journal article supplement (doi:10.3390/nu13124221), 2021-11-24
Supplement: s1 [file s1]

# Supplementary Materials

*Systematic Review*

## Effect of Anti-Inflammatory Diets on Pain in Rheumatoid Arthritis: A Systematic Review and Meta-Analysis

Katja A. Schönenberger <sup>1,2,\*</sup>, Anne-Catherine Schüpfer <sup>1</sup>, Viktoria L. Gloy <sup>3</sup>, Paul Hasler <sup>4</sup>, Zeno Stanga <sup>1</sup>, Nina Kaegi-Braun <sup>5</sup>, Emilie Reber <sup>1</sup>

<sup>1</sup> Department of Diabetes, Endocrinology, Nutritional Medicine and Metabolism, Inselspital, Bern University Hospital, University of Bern, 3010 Bern, Switzerland; anne-catherine.schuepfer@students.unibe.ch (A.-C.S.); zeno.stanga@insel.ch (Z.S.); emilie.reber@insel.ch (E.R.)

<sup>2</sup> Division of Clinical Pharmacy and Epidemiology, Department of Pharmaceutical Sciences, University of Basel, 4031 Basel, Switzerland

<sup>3</sup> Basel Institute for Clinical Epidemiology and Biostatistics, Department of Clinical Research, University Hospital Basel, University of Basel, 4031 Basel, Switzerland; viktorija.gloy@usb.ch

<sup>4</sup> Division of Rheumatology, Medical University Department, University of Basel Medical Faculty, Kantonsspital Aarau, 5001 Aarau, Switzerland; paul.hasler@ksa.ch

<sup>5</sup> Division of General Internal and Emergency Medicine, Medical University Department, University of Basel Medical Faculty, Kantonsspital Aarau, 5001 Aarau, Switzerland; nina.kaegi@ksa.ch

\* Correspondence: katja.schoenenberger@extern.insel.ch; Tel.: +41-31-664-21-05

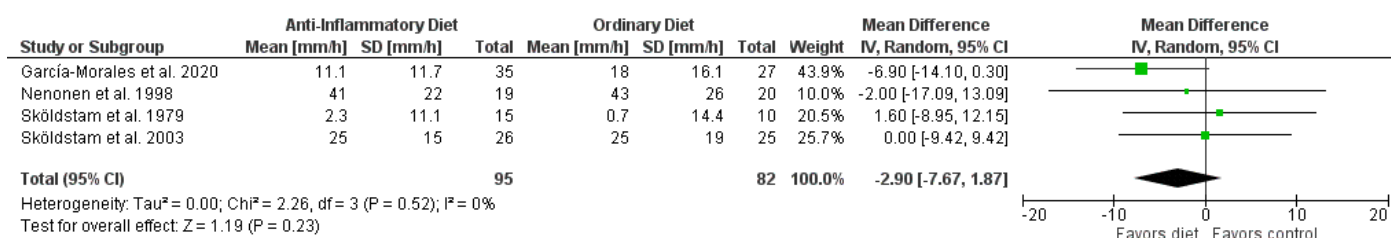

**Figure S1.** Forest plot summarizing the effect of anti-inflammatory diets on erythrocyte sedimentation rate

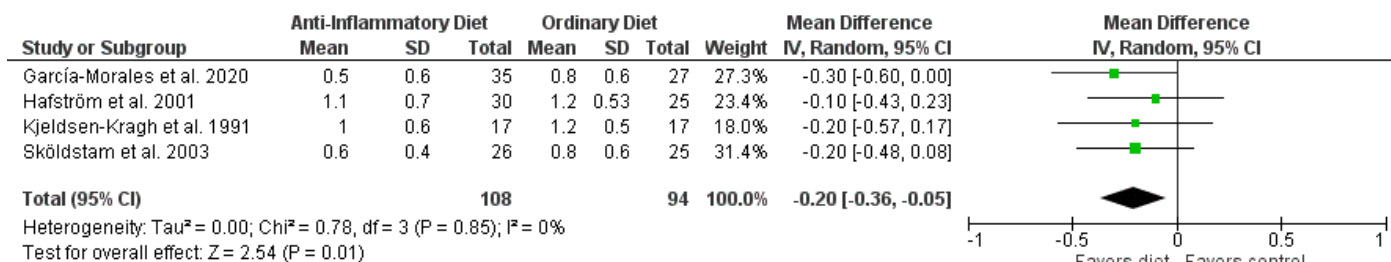

**Figure S2.** Forest plot summarizing the effect of anti-inflammatory diets on health assessment questionnaire score

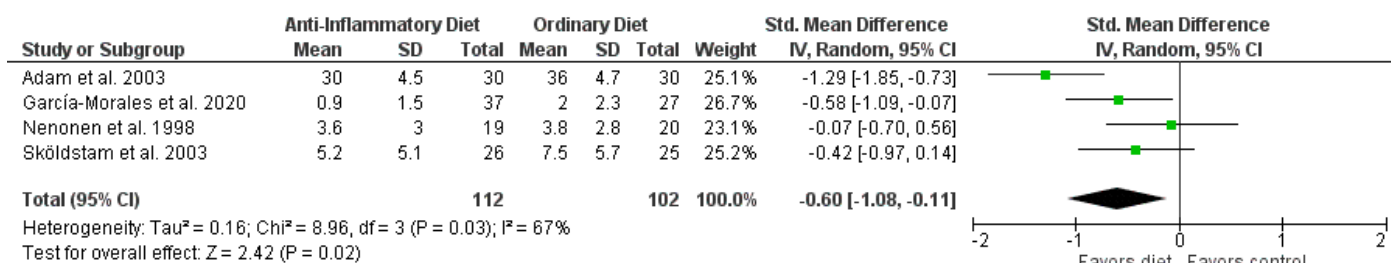

**Figure S3.** Forest plot summarizing the effect of anti-inflammatory diets on swollen joint count

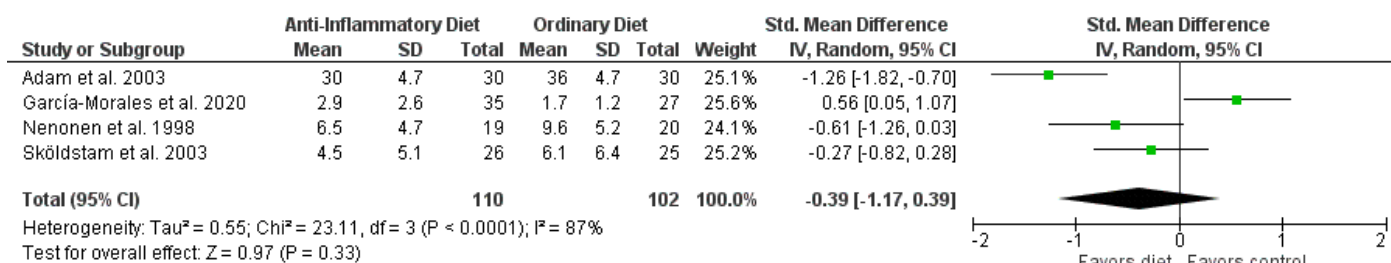

**Figure S4.** Forest plot summarizing the effect of anti-inflammatory diets on tender joint count

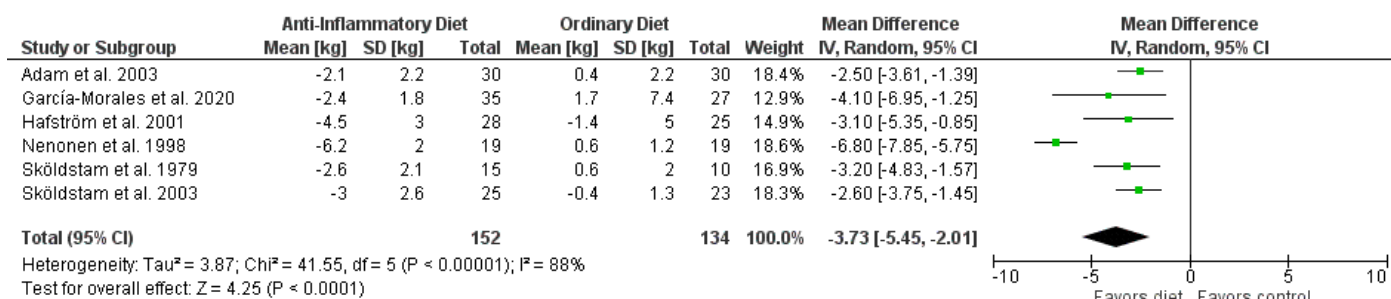

**Figure S5.** Forest plot summarizing the effect of anti-inflammatory diets on weight loss

SD for Adam et al. 2003, García-Morales et al. 2020, Hafström et al. 2001, and Sköldstam et al. 2003 imputed from Nenonen et al. 1998 [1-3].

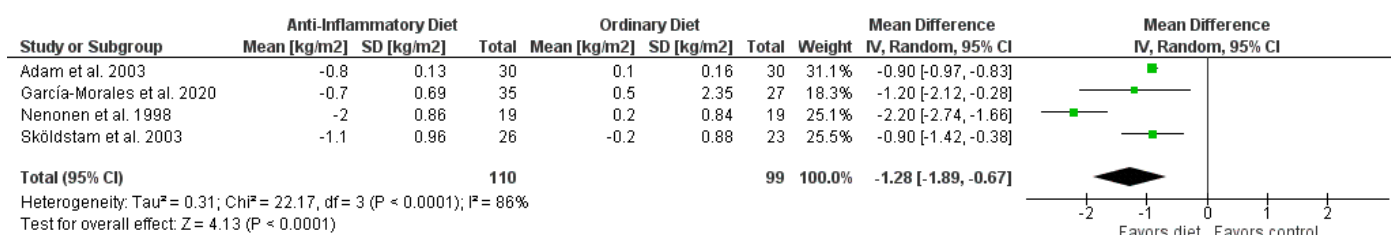

**Figure S6.** Forest plot summarizing the effect of anti-inflammatory diets on body mass index decrease  
 SD for Adam et al. 2003, García-Morales et al. 2020, and Sköldstam et al. 2003 imputed from Nenonen et al. 1998 [1-3].

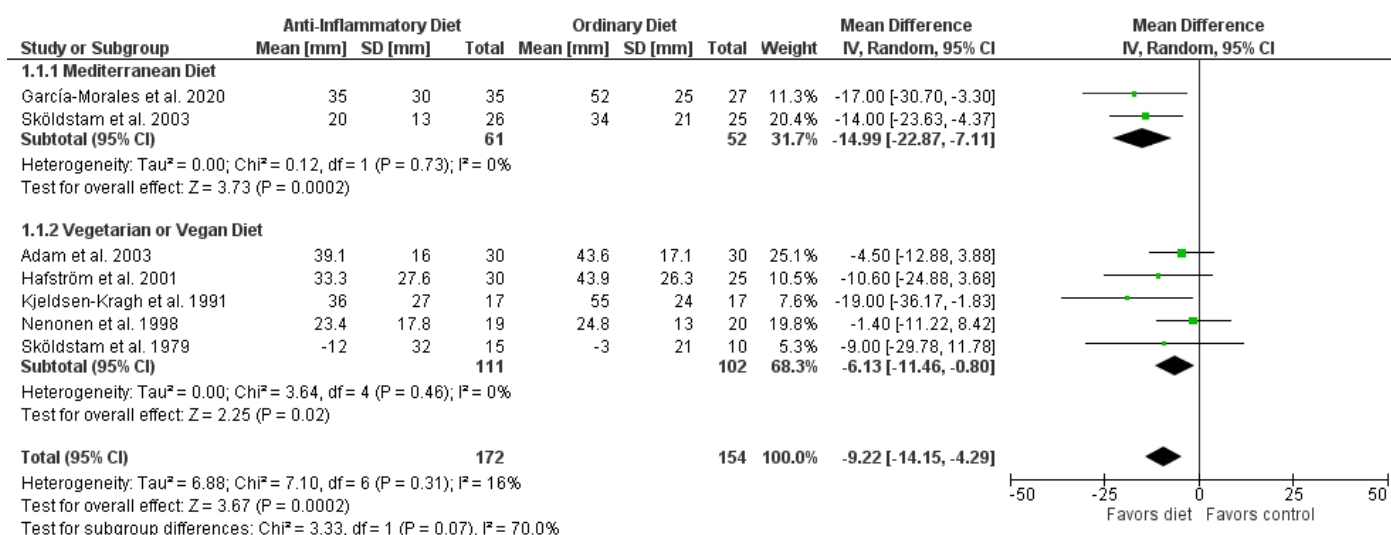

**Figure S7.** Forest plot summarizing the subgroup analysis on the effect of Mediterranean vs. vegetarian or vegan diets on pain

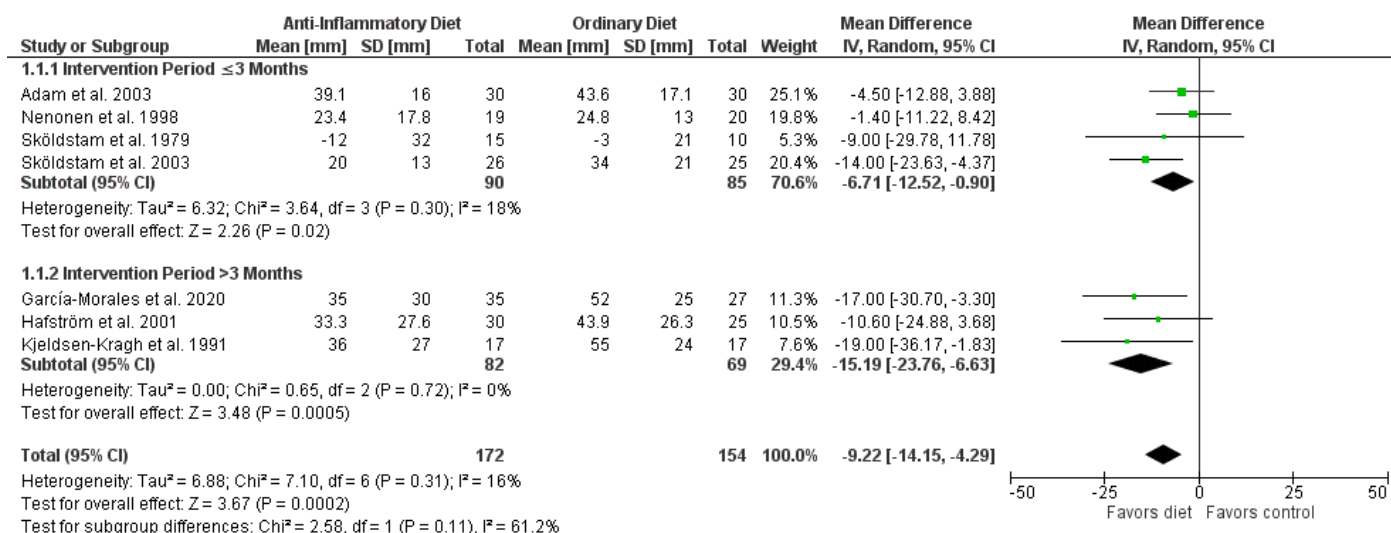

**Figure S8.** Forest plot summarizing the subgroup analysis on the effect of intervention duration on pain

## References

- Follmann, D.; Elliott, P.; Suh, I.; Cutler, J. Variance imputation for overviews of clinical trials with continuous response. *J Clin Epidemiol* **1992**, *45*, 769-773, doi:10.1016/0895-4356(92)90054-q.
- Abrams, K.R.; Gillies, C.L.; Lambert, P.C. Meta-analysis of heterogeneously reported trials assessing change from baseline. *Stat Med* **2005**, *24*, 3823-3844, doi:10.1002/sim.2423.
- Chapter 6: Choosing effect measures and computing estimates of effect. Higgins, J.P.T.; Li, T.; Deeks, J.J.; Eds. In: *Cochrane Handbook for Systematic Reviews of Interventions* version 6.2 (updated February 2021). Higgins, J.P.T.; Thomas, J.; Chandler, J.; Cumpston, M.; Li, T.; Page, M.J.; Welch, V.A.; Eds. Cochrane, 2021. Available from [www.training.cochrane.org/handbook](http://www.training.cochrane.org/handbook).
